# Supplementary material
Source: PubMed Central journal article supplement (PMC3375942)
Supplement: supp_pp.111.192575_195275suppl_figure_1.pdf [file supp_pp.111.192575_195275suppl_figure_1.pdf]

# Supplementary figure 1.

**A**

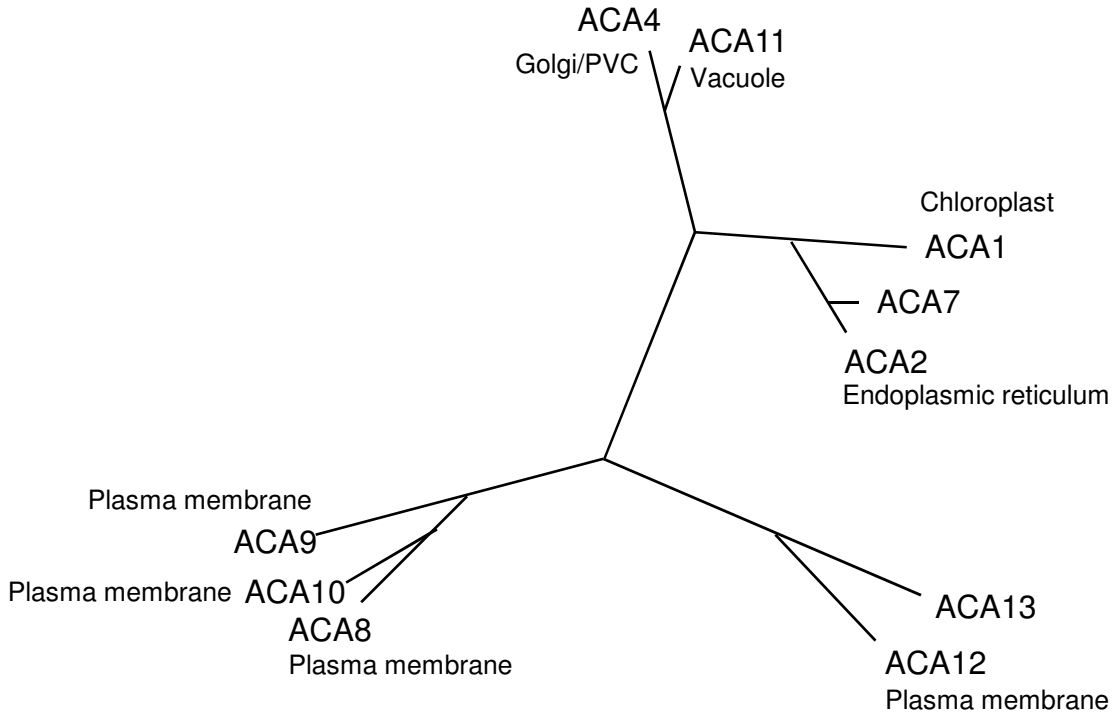

**B**

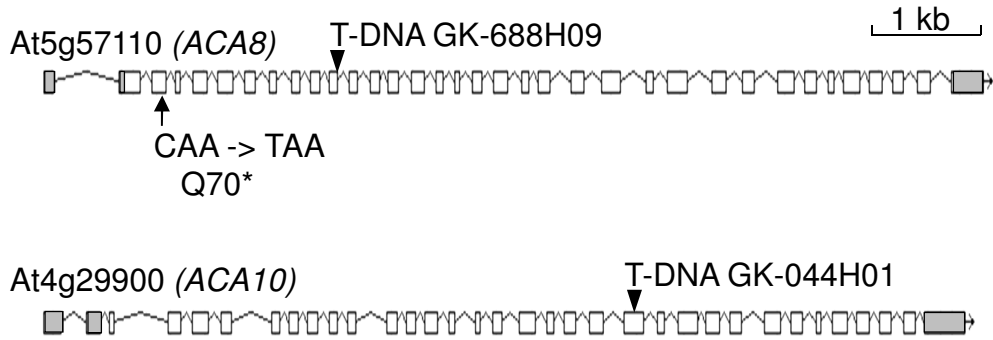

**C**

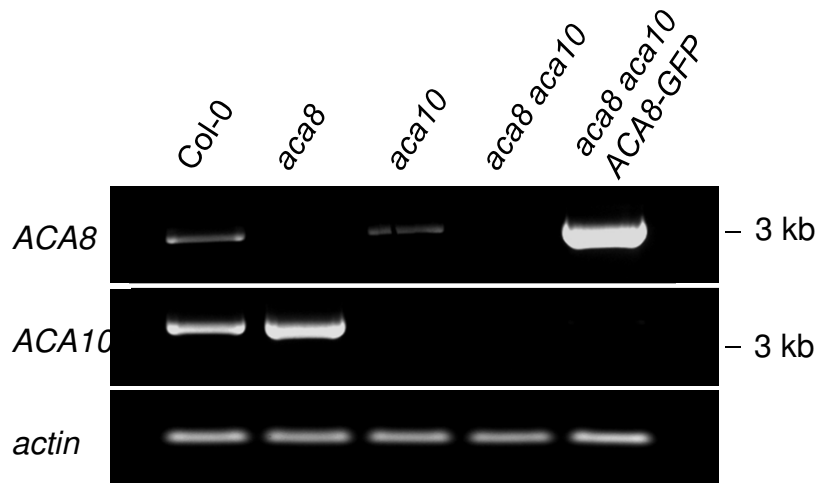

**Figure S1.** Characterization of *ACA8* and *ACA10* loss-of-function lines. **A.** The family of autoinhibited  $\text{Ca}^{2+}$  ATPases (ACAs) in Arabidopsis; phylogenetic tree adapted from Baxter et al., 2003. Subcellular localization of ACA proteins is indicated when known. **B.** Intron-exon structure of *ACA8* and *ACA10*. Arrowheads indicate the positions of the T-DNA insertions; the arrow indicates the position of the point mutation leading to the Q70\* mutation in *ACA8*. Grey boxes, un-translated regions; white boxes, exons. **C.** RT-PCR confirmation of *aca8* and *aca10* knock-out alleles as well as an *aca8 aca10 ACA8-GFP* complemented line.
