# Supplementary material
Source: PubMed Central journal article supplement (PMC3375942)
Supplement: supp_pp.111.192575_195275suppl_figure_2.pdf [file supp_pp.111.192575_195275suppl_figure_2.pdf]

## Supplementary figure 2.

**A**

### ACA8

MTSLKSSPGRRRGGDVESGKSEHADSDSDTFYIPSKNASIERLQQRKAALVLNARRFRYTLDLKKEQE  
 TREMRQKIRSHAHALLAANRFMDMGRESGVEKTTGPPATPAGDFGITPEQLVIMSKDHNSGALEQYGGTQGL  
 ANLLKTNPEKGISGDDDDLLKRRKTIYGSNTYPRKKGKGFRLFLWDACHDLTLIILMVAVASLALGIKTEG  
 IKEGWYDGGSI AFAVILVIVVTAVSDYKQSLQFQNLNDEKRNHLEVLRRGRRVEISYDIVGDVPIPLNI  
 GNQVPADGVLISGHSALDESSMTGESKIVNKDANKDPFLMSGCKVADNGSMMLVTGVTGVTNTEWGLLMAS I  
 SEDNGEETPLQVRLNGVATFIGSIGLAVAAAVLVILLTRYFTGHTKDNNGGPQFVKGKTKVGHVIDDVVKV  
 LTVAVTIVVVAVPEGLPLAVTTLTAYSMRKMMDKALVRRLSACETMGSATTICSDKTGTLTLNQMTVVES  
 YAGGKKTDTQLPATITSLVVEGISQNTTGSIFVPEGGDLEYSGSPTKAILGWGVK | LGMNFETARSQS  
 SILHAFPFPNSEKRRGGVAVKTADGEVHVHWKASEIVLASCRSYIDEDGNVAPMTDDKASFFKNGINDMAG  
 RTRLRCVALAFRTYEAKEVPTGEELSKWVLPEDDLILLAIIVGKIDPCRPGVKDSVVLCCQNAGVKVRMVTGDN  
 VQTARAIALECGILSSDADLSEPTLIEGKSFREMTDAERDKISDKISVMGRSSPNDKLLLVQSLRRQGHVV  
 AVTGDGTNDAPALHEADIGLAMGIAGTEVAKESDIIILDDNFASVVKVVRWGRSVYANIQKFIQFQLTVN  
 VAALVINVVAAISSGDVPLTAVQLLWVNLIMDTL GALALATEPPTDHLMDRPPVGRKEPLITNIMWRNLLI  
 QAIYQVSVLLTLNFRGISILGLEHEVHEHATRVKNTIIFNAFVLCQAFNEFNARKPDEKNIFKGVIKNRLF  
 MGIIVITLVLQVIVVEFLGKFASTTKLNWKQWLICVIGIVISWPLALVGK FIPVPAAPISNKLKVLFKFWGK  
 KKNSSGEGSL

### ACA10

MSGQFNNSPRGEDKDV EAGTSSFTYEDSPFDIASTKNAPVERLRWRQAALVLNARRFRYTLDLKREED  
 KKQMLRKMRAHAQAIRAAHLFKAAASRVGTGIASPLPTPGGGDFGIGQEIVSISRDNIGALQELGGVRL  
 SDLLKTNLEKGIHGDDDDILKRRSAFGSNTYPQKKGRSFWRVWEASQDLTLIILIVAAVASLALGIKTEG  
 IEKGWYDGISIAFAVLLVIVVTATS DYRQSLQFQNLNDEKRNIRLEVTRDGRVEISYDIVGDVPIPLNI  
 GDQVPADGVLVAGHSLAVDESSMTGESKIVQKNSTKHPFLMSGCKVADNGTMLVTGVTGVTNTEWGLLMASV  
 SEDNGEETPLQVRLNGVATFIGIVGLTVAGVVLVFLVVRVYFTGHTKNEQGGPQFVIGKTKFEHVLDDLVEI  
 FTVAVTIVVVAVPEGLPLAVTTLTAYSMRKMMDKALVRRLSACETMGSATTICSDKTGTLTLNEMTVVEC  
 YAGLQKMDSPDSSSKLPSAFTSILVEGIAHNTGVSFR | SESGEIQVSGSPTERAILNWAIKLGMDFDALK  
 SESSAVQFPFPNSEKRRGGVAVKSPDSSVHIHWKGAEEIVLGSCTHYMDESESFVMSDEKMGGLKDAIDD  
 MAARSLRCVAIAFRTFEADKIPTDEEQLSRWELPEDDLILLAIIVGKIDPCRPGVKNSVLLCQAGVVRMV  
 TGDNIQTAK | AIALECGILASDSDASEPNLIEGKVFRSYSEEERDRICEEISVMGRSSPNDKLLLVQSLKR  
 RGHVVAVTGDGTNDAPALHEADIGLAMGIQTEVAKESDIIILDDNFESVVKVVRWGRSVYANIQKFIQF  
 QLTVNVAALVINVVAASAGEVPLTAVQLLWVNLIMDTL GALALATEPPTDHLMDRAPVGRREPLITNIMW  
 RNLFIQAMYQVTVLLILNFRGISILHLKSKPNAERVKNTVIFNAFVICQVFNEFNAR | KPDEINIFRGVLR  
 NHLFVGIISITIVLQVVIVEFLGTFASTTKLDWEMWLVICIGISISWPLAVIGKLIPVPETPVSQYFRINR  
 WRRNSSG

**B**

| protein      | peptide sequence         | <i>n</i> peptide | occurrence <sup>a</sup> | best mascot score |
|--------------|--------------------------|------------------|-------------------------|-------------------|
| <b>ACA8</b>  |                          |                  |                         |                   |
|              | SHAHALLAANR              | 4                | 2/6 - (0/3)             | 66.4              |
|              | DHNSGALEQYGGTQGLANLLK    | 1                | 1/6 - (0/3)             | 43.1              |
|              | GISGDDDDLLK              | 1                | 1/6 - (0/3)             | 39.3              |
|              | NIHLEVLRR                | 3                | 3/6 - (0/3)             | 32.1              |
|              | AILGWGVK                 | 1                | 1/6 - (0/3)             | 31.7              |
|              | LGMNFETAR                | 1                | 1/6 - (0/3)             | 61.7              |
|              | TYEAKEVPTGEELSK          | 5                | 5/6 - (0/3)             | 78.4              |
|              | DSVVLCCQNAGVK            | 1                | 1/6 - (0/3)             | 52.2              |
|              | MVTGDNVQTAR              | 4                | 3/6 - (0/3)             | 91.3              |
|              | FIPVPAAPISNK             | 2                | 2/6 - (0/3)             | 39.3              |
| <b>ACA10</b> |                          |                  |                         |                   |
|              | DNIGALQELGGVRL           | 5                | 5/6 - (0/3)             | 108.9             |
|              | GIHGDDDDILK              | 3                | 3/6 - (0/3)             | 55.7              |
|              | SAFGSNTYPQKK             | 3                | 3/6 - (0/3)             | 42.3              |
|              | LPSAFTSILVEGIAHNTGVSFR   | 1                | 1/6 - (0/3)             | 46.7              |
|              | <b>SESGEIQVSGSPTER</b>   | 6                | 6/6 - (0/3)             | 68.2              |
|              | <b>MVTGDNIQTAK</b>       | 7                | 6/6 - (0/3)             | 62.2              |
|              | AIALECGILASDSDASEPNLIEGK | 1                | 1/6 - (0/3)             | 77.1              |
|              | SSPNDKLLLVQSLK           | 2                | 2/6 - (0/3)             | 71                |
|              | VKNTVIFNAFVICQVFNEFNAR   | 1                | 1/6 - (0/3)             | 52.8              |
|              | KPDEINIFR                | 1                | 1/6 - (0/3)             | 44.6              |
|              | LIPVPETPVSQYFR           | 2                | 2/6 - (0/3)             | 57.1              |

**Figure S2.** Identification of ACA8 and ACA10 peptides by mass-spectrometry analysis of immuno-purified FLS2-GFP. 21 *in vitro* grown seedlings were used either untreated or treated with flg22. Sample preparations, immuno-purifications and MS/MS analysis were performed essentially as described in Roux et al. (2011). Briefly, immuno-purifications of GFP-tagged proteins were done using the magnetic GFP-trap system from Miltenyi Biotech using an IGEPAL-solubilised protein extract (4 mg protein per mL). Beads were washed with 0.1% IGEPAL extraction buffer prior to elution in boiling Laemli buffer. **A.** Peptide coverage of ACA8 and ACA10 proteins identified in an FLS2-GFP immuno-purified complex. Peptides found in untreated samples are highlighted in green, peptides found in flg22-elicited samples are in orange, peptides found in both conditions are indicated in blue, peptides found in all biological replicates of untreated and treated samples are shown in bold. **B.** Tryptic peptides identified by HPLC-electrospray ionization-MS/MS analysis. Peptides occurring in all biological replicates are marked in bold. Reproducibility (<sup>a</sup>) of specific tryptic peptides out of three biological replicates of untreated or flg22-treated samples prepared from Arabidopsis plants expressing FLS2-GFP. In brackets, no peptides were detected in technical controls using wild-type plants (n=2) or plants expressing a plasma membrane addressed GFP (Lti6b-GFP; n=1).
