# Supplementary material
Source: PubMed Central journal article supplement (PMC3375942)
Supplement: supp_pp.111.192575_195275suppl_figure_4.pdf [file supp_pp.111.192575_195275suppl_figure_4.pdf]

## Supplementary figure 4.

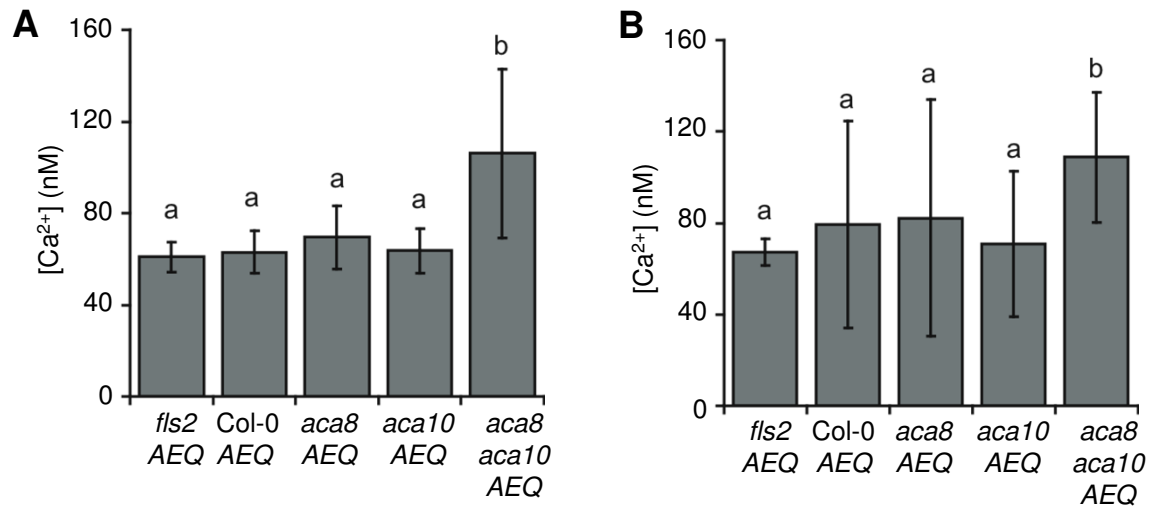

**Figure S4.** **A.** Steady-state Ca<sup>2+</sup> levels before flg22-triggered Ca<sup>2+</sup> burst and **B.** after the burst. Data were calculated from the absolute cytosolic [Ca<sup>2+</sup>] before and at 38 min after elicitation and were averaged over two independent biological replicates. Error bars indicate standard deviations based on n = 14-16 samples, letters indicate significant differences at p<0.05 based on ANOVA Tukey-HSD test. Similar results were obtained at least in two independent experiments.
