# Supplementary material
Source: PubMed Central journal article supplement (PMC3375942)
Supplement: supp_pp.111.192575_195275suppl_figure_5.pdf [file supp_pp.111.192575_195275suppl_figure_5.pdf]

## Supplementary figure 5.

**A**

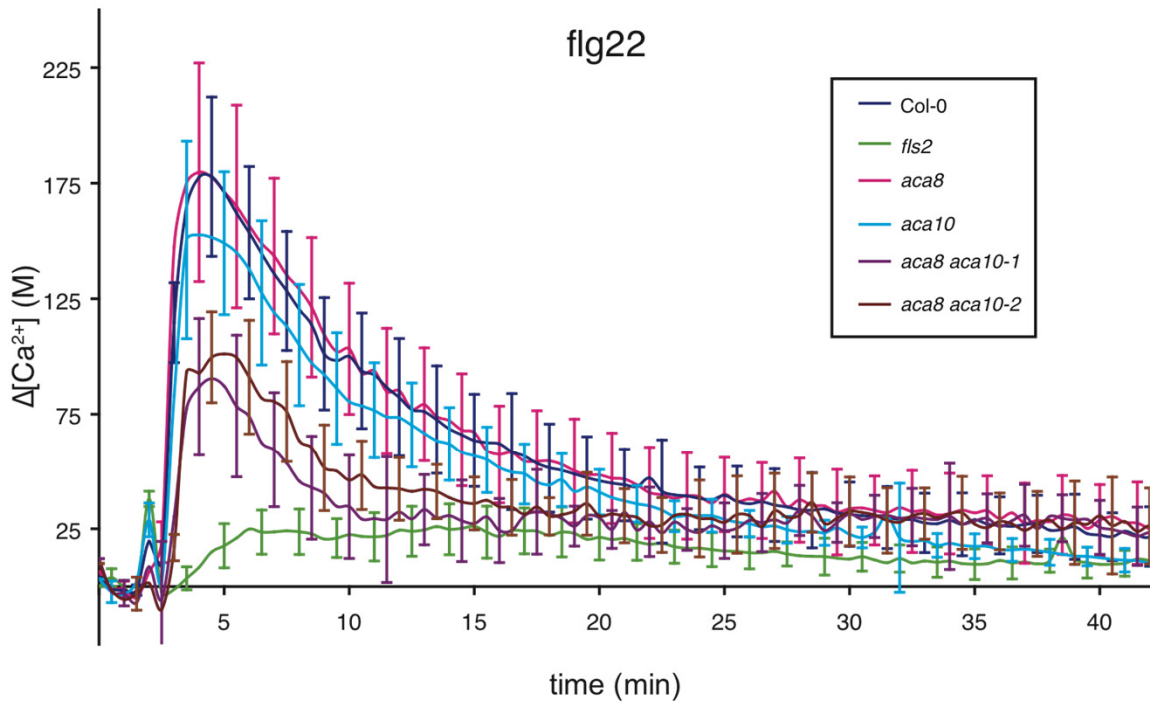

**B**

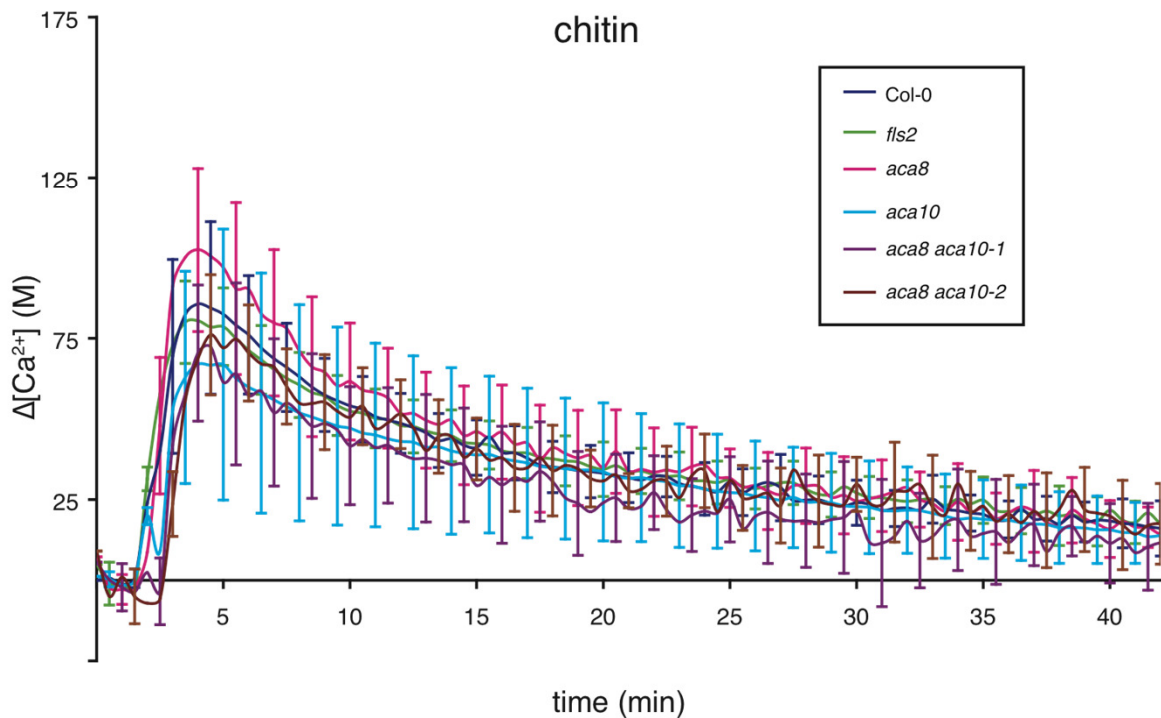

**Figure S5.** Patterns of the  $\text{Ca}^{2+}$  burst induced by flg22 (**A**) and chitin (**B**) over time. Included are two *aca8 aca10* lines from independent crosses showing similar results. Curves normalized to steady state cytosolic  $[\text{Ca}^{2+}]$  show  $\Delta[\text{Ca}^{2+}]$  after MAMP-treatments of one representative biological experiment. Error bars show standard deviations based on  $n = 6-8$  samples. Similar results were obtained at least in two independent experiments.
