# Supplementary material
Source: PubMed Central journal article supplement (PMC3375942)
Supplement: supp_pp.111.192575_195275suppl_figure_6.pdf [file supp_pp.111.192575_195275suppl_figure_6.pdf]

## Supplementary figure 6.

**A**

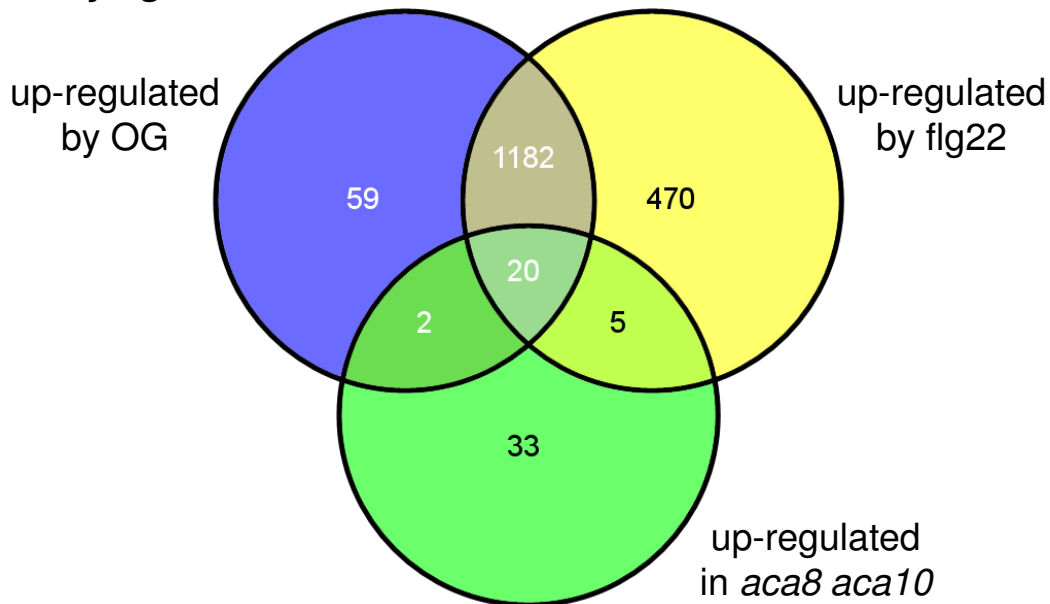

**B**

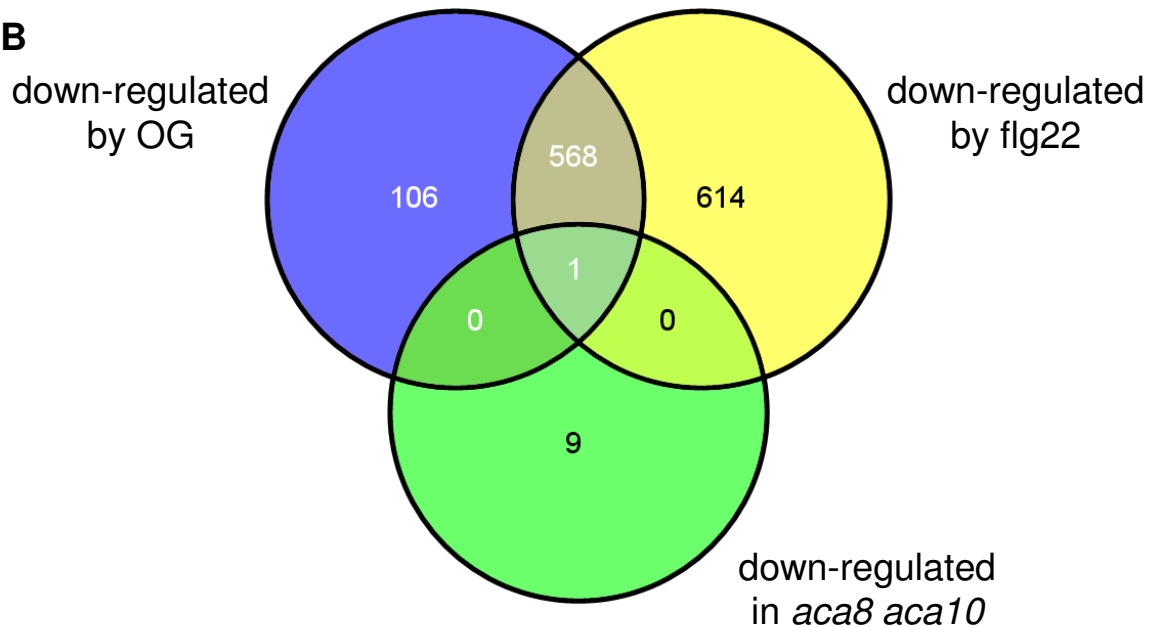

**C**

| Gene                                   | CPK5 log2 | CPK11 log2 |
|----------------------------------------|-----------|------------|
| <i>aca8 aca10</i> up-regulated genes   |           |            |
| At1g26380                              | 2.6       | 1.9        |
| At2g30750                              | 1.7       | 1.7        |
| At3g55470                              | 1.1       | 1.1        |
| At1g26390                              | 1.5       | 2.0        |
| At1g67980                              | 2.5       | 1.5        |
| At2g43000                              | 1.9       | 1.7        |
| At5g38900                              | 1.2       | 1.0        |
| At3g26470                              | nd        | -1.6       |
| At3g50770                              | nd        | -1.6       |
| <i>aca8 aca10</i> down-regulated genes |           |            |
| At1g58340                              | 1.7       | 2.1        |
| At1g55020                              | 1.4       | nd         |

**Figure S6.** Altered gene expression in *aca8 aca10* mutants. Overlap of genes up-regulated (A) and down-regulated (B) in *aca8 aca10* and upon elicitation with flg22 and oligogalacturonides (OG). Genes represented show at least two-fold regulation ( $p < 0.05$ ) within 1 hr after MPMP treatment according to Denoux et al. (2008). Nine *aca8 aca10* de-regulated genes were removed from the analysis because they were not present in the Denoux et al. (2008) study. The tool used for the Venn diagrams is available at “Venny” <http://bioinfogp.cnb.csic.es/tools/venny/index.html>.

C. Flg22-induced CPK5- and CPK11-dependent expression of *aca8 aca10* de-regulated genes (asterisks) according to Boudsocq et al. (2010).
