# Supplementary material
Source: PubMed Central journal article supplement (PMC3375942)
Supplement: supp_pp.111.192575_195275suppl_figure_7.pdf [file supp_pp.111.192575_195275suppl_figure_7.pdf]

Supplementary figure 7.

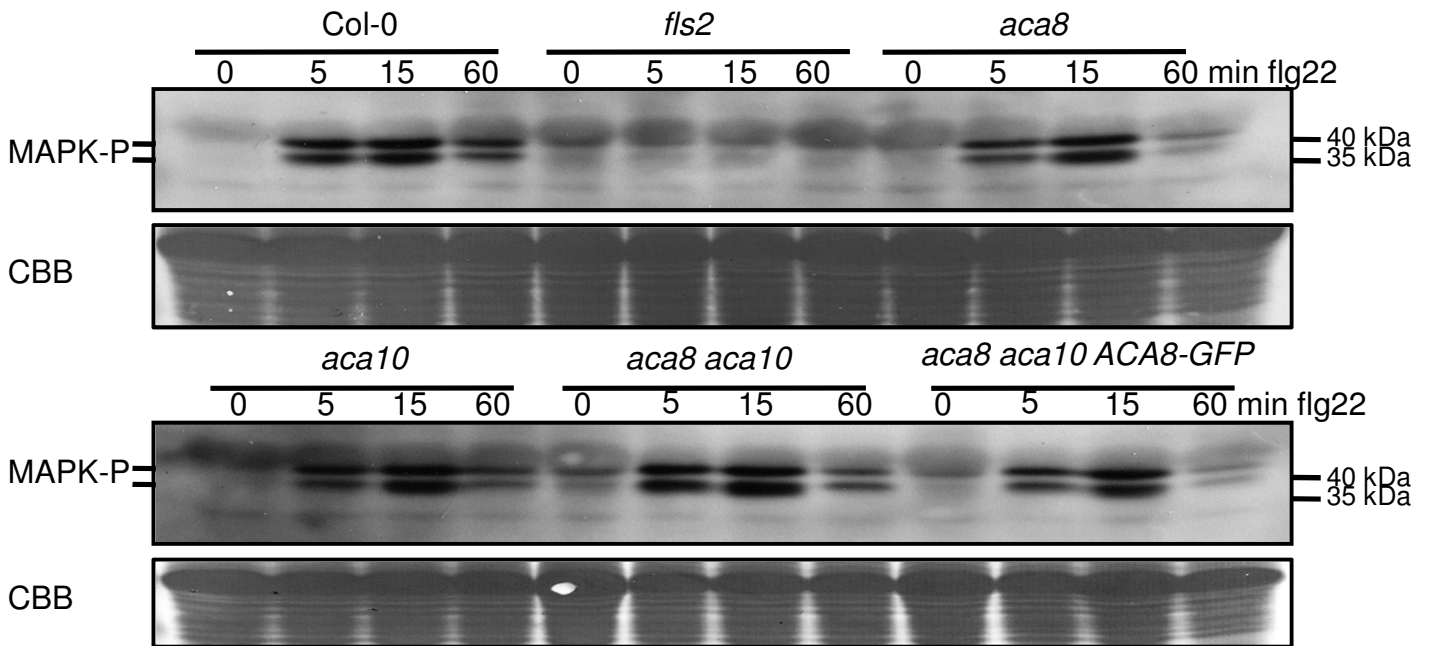

**Figure S7.** Protein kinase activation in flg22 signalling. MAPK activation upon flg22 application over time. Coomassie staining (CBB) is included as loading control. Similar results were obtained in at least two independent experiments.
