# Supplementary material
Source: PubMed Central journal article supplement (PMC3375942)
Supplement: supp_pp.111.192575_195275suppl_figure_8.pdf [file supp_pp.111.192575_195275suppl_figure_8.pdf]

## Supplementary figure 8.

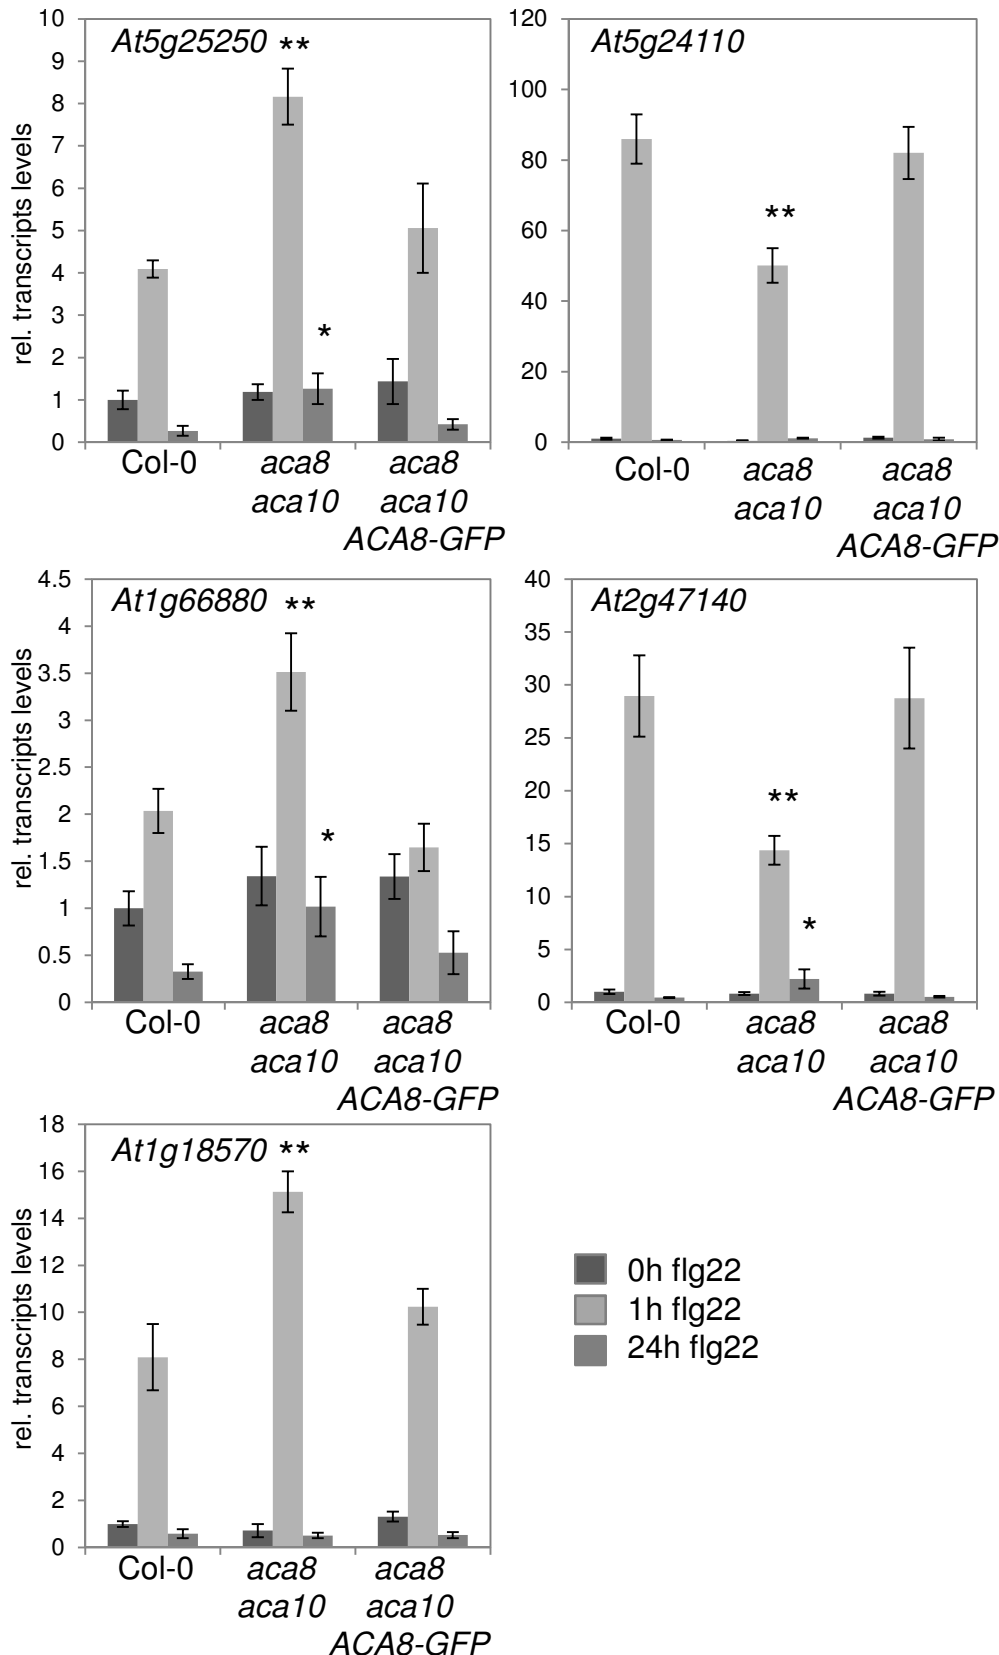

**Figure S8.** Expression analysis of defence marker genes. Quantitative real-time PCR monitoring transcript levels of the indicated genes in Col-0, *aca8 aca10* and *aca8 aca10 ACA8-GFP* plants. Genes in this analysis were not included by Boudsocq et al. (2010). Actin was used as control. Error bars indicate standard deviations based on n = 3 biological experiments with each three technical replicates; asterisks indicate significant differences between Col-0 and *aca8 aca10* at p < 0.05 (\*) and p < 0.01 (\*\*) based on Student's T-test.
